# Supplementary material
Source: PubMed Central journal article supplement (PMC5551492)
Supplement: NIHMS886582-supplement-Supplemental_Content.pdf [file NIHMS886582-supplement-Supplemental_Content.pdf]

## Supplementary Online Content

Salgado R, Denkert C, Campbell C, et al. Tumor-infiltrating lymphocytes and associations with pathological complete response and event-free survival in HER2-positive early-stage breast cancer treated with lapatinib and trastuzumab: a secondary analysis of the NeoALTTO Trial. *JAMA Oncol*. Published online April 30, 2015. doi:10.1001/jamaoncol.2015.0830

**eFigure 1.** Distribution of stromal TILs in whole cohort of HER2-positive primary breast cancer as well as according to HR status. P value represents a Mann-Whitney test.

**eFigure 2.** Cubic splines to explore the relationship between TILs and pCR and EFS. As seen, the relationship between TILs and pCR is not linear: rates of pCR increase sharply at TILs levels of 5% (A); however, is linear between TILs and EFS (B)

**eTable.** Multivariate analyses with lapatinib-only treatment arm

This supplementary material has been provided by the authors to give readers additional information about their work.

**eFigure 1.** Distribution of stromal TILs in whole cohort of HER2-positive primary breast cancer as well as according to HR status. P value represents a Mann-Whitney test.

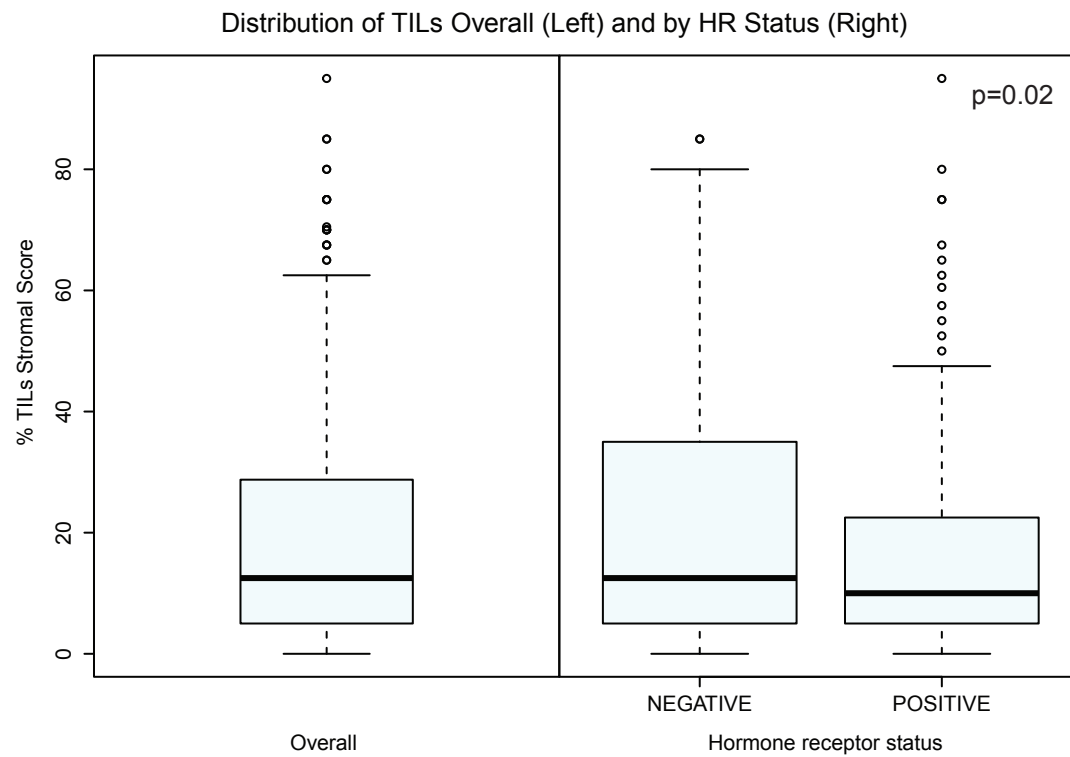

**eFigure 2.** Cubic splines to explore the relationship between TILs and pCR and EFS. As seen, the relationship between TILs and pCR is not linear: rates of pCR increase sharply at TILs levels of 5% (A); however, is linear between TILs and EFS (B)

**A**

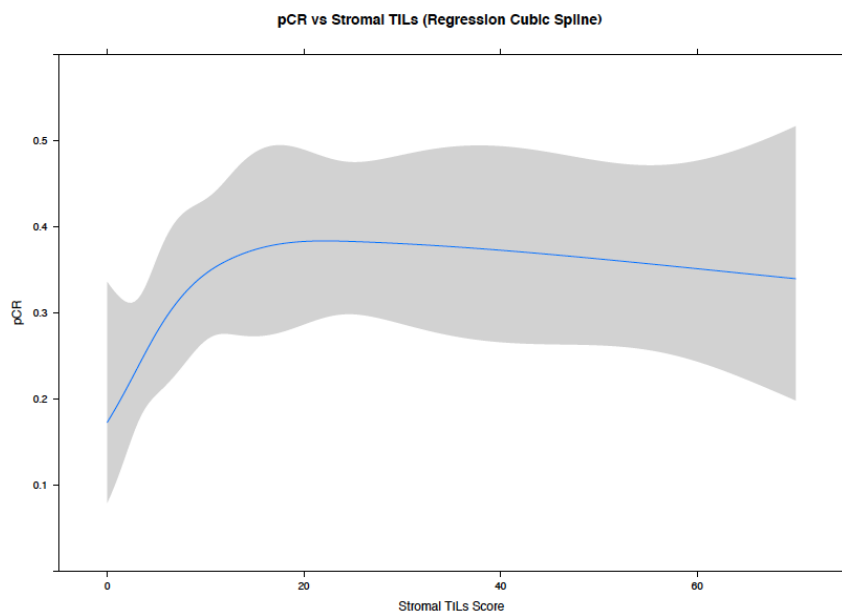

**B**

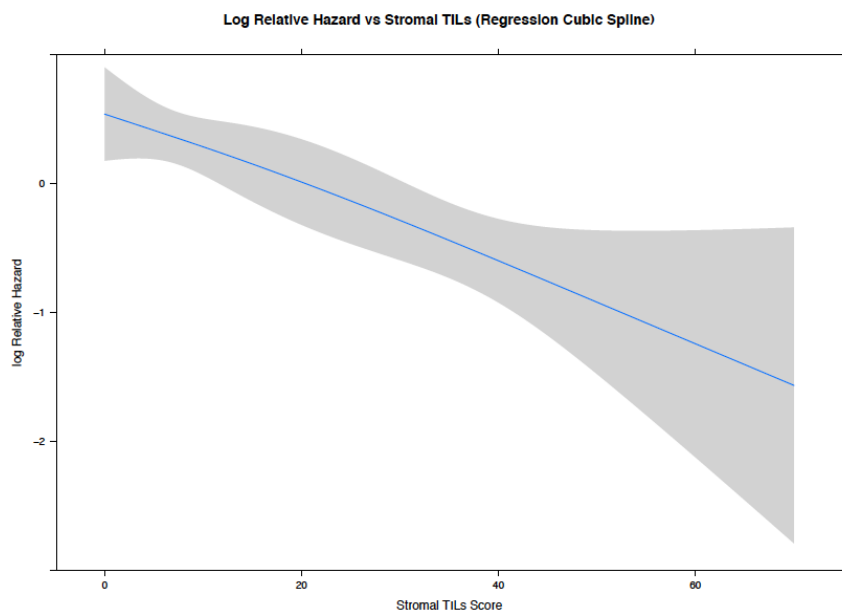

**eTable. Multivariate analyses with lapatinib-only treatment arm****(A) Analysis without pCR (baseline characteristics) (n=387)**

| <b>Multivariate Effect</b>   | <b>Pvalue</b> | <b>Hazard Ratio</b>                                   |
|------------------------------|---------------|-------------------------------------------------------|
| Stromal TILs %               | 0.0001        | HR: 0.97 (Per unit increase, 95% CI: 0.95-0.98)       |
| Hormone Receptor Status      | 0.0679        | HR: 0.68 (Ref = Negative, 95% CI: 0.44-1.03)          |
| Nodal Status                 | 0.2622        | HR: 1.35 (Ref = N0/1, 95% CI: 0.77-2.25)              |
| Tumour Size                  | 0.587         | HR: 1.13 (Ref = T2, 95% CI: 0.73-1.72)                |
| Planned Conservative Surgery | 0.0284        | HR: 0.56 (Ref = Not a candidate, 95% CI: 0.32-0.92)   |
| Treatment Lapatinib alone    | 0.1786        | HR: 1.40 (Ref = Trastuzumab alone, 95% CI: 0.86-2.30) |
| Treatment combination        | 0.3643        | HR: 0.78 (Ref = Trastuzumab alone, 95% CI: 0.45-1.33) |

**(B) Landmark analyses including pCR (n=387)**

| <b>Multivariate Effect</b>   | <b>Pvalue</b> | <b>Hazard Ratio</b>                                   |
|------------------------------|---------------|-------------------------------------------------------|
| Stromal TILs %               | 0.0002        | HR: 0.97 (Per unit increase, 95% CI: 0.96-0.99)       |
| Hormone Receptor Status      | 0.0246        | HR: 0.61 (Ref = Negative, 95% CI: 0.40-0.94)          |
| Nodal Status                 | 0.2229        | HR: 1.39 (Ref = N0/1, 95% CI: 0.80-2.31)              |
| Tumour Size                  | 0.8521        | HR: 1.04 (Ref = T2, 95% CI: 0.67-1.60)                |
| Planned Conservative Surgery | 0.0239        | HR: 0.54 (Ref = Not a candidate, 95% CI: 0.31-0.90)   |
| Treatment Lapatinib alone    | 0.1712        | HR: 1.41 (Ref = Trastuzumab alone, 95% CI: 0.86-2.33) |
| Treatment combination        | 0.7122        | HR: 0.90 (Ref = Trastuzumab alone, 95% CI: 0.51-1.55) |
| pCR                          | 0.0018        | HR: 0.42 (Ref = No pCR, 95% CI: 0.23-0.71)            |
